# Supplementary material
Source: publisher figshare collection journal article supplement (https://tandf.figshare.com/ndownloader/files/38196770)
Supplement: Supplementary file 1 [file 38196770]

## Sheet: Sheet1
Supplemental table 1: The family, common name, scientific name, and dates of spawning taken from Frimpong & Angermeier 2011.
Family	Common Name	Scientific Name	JAN	FEB	MAR	APR	MAY	JUN	JUL	AUG	SEP	OCT	NOV	DEC
Leuciscidae
	Whitefin Shiner	Cyprinella nivea	0	0	0	0	0	1	1	1	0	0	0	0
	Eastern Silvery Minnow	Hybognathus regius	0	0	1	1	1	0	0	0	0	0	0	0
	Rosyface Chub	Hybopsis rubrifrons	0	0	0	0	1	1	0	0	0	0	0	0
	Bluehead Chub	Nocomis leptocephalus	0	0	0	0	1	0.5	0	0	0	0	0	0
	Golden Shiner	Notemigonus crysoleucas	0	0	0	0.25	1	1	1	0.25	0	0	0	0
	Spottail Shiner	Notropis hudsonius	0	0	0	0.25	1	0	0	0	0	0	0	0
	Yellowfin Shiner	Notropis lutipinnis	0	0	0	0	1	1	1	0	0	0	0	0
Catostomidae
	White Sucker	Catostomus commersoni	0	0	0.75	1	0	0	0	0	0	0	0	0
	Northern Hog Sucker	Hypentelium nigricans	0	0	0	1	0.5	0	0	0	0	0	0	0
	Spotted Sucker	Minytrema melanops	0	0	0	0.75	0.75	0	0	0	0	0	0	0
	Notchlip Redhorse	Moxostoma collapsum	0	0	0.5	1	0.5	1	1	1	1	1	1	1
	Striped Jumprock	Moxostoma rupiscartes	0	0	0.25	0	0	0	0	0	0	0	0	0
Ictaluridae
	Snail Bullhead	Ameiurus brunneus	0	0	0.25	1	1	0.25	0	0	0	0	0	0
	Flat Bullhead	Ameiurus platycephalus	0	0	0	0	0	1	1	0	0	0	0	0
	Channel Catfish	Ictalurus punctatus	0	0	0	0	0.25	1	0.25	0	0	0	0	0
	Margined Madtom	Noturus insignis	0	0	0	0	1	1	0	0	0	0	0	0
	Speckled Madtom	Noturus leptacanthus	0	0	0	0	1	1	1	1	0	0	0	0
Poeciliidae
	Eastern Mosquitofish	Gambusia holbrooki	NA
Centrarchidae
	Redbreast Sunfish	Lepomis auritus	0	0	0	0.25	1	1	0	0	0	0	0	0
	Green Sunfish	Lepomis cyanellus	0	0	0	0	1	1	1	1	0	0	0	0
	Warmouth	Lepomis gulosus	0	0	0	0	0.75	1	1	1	0	0	0	0
	Bluegill	Lepomis macrochirus	0	0	0	0	0.5	1	1	1	0	0	0	0
	Redear Sunfish	Lepomis microlophus	0	0	0	0	1	1	1	1	0	0	0	0
	Bartram's bass	Micropterus cf. coosae	NA
	Spotted Bass	Micropterus punctulatus	0	0	0	0.25	1	0.5	0	0	0	0	0	0
	Largemouth Bass	Micropterus salmoides	0	0	0	0.5	1	1	0.5	0	0	0	0	0
	Alabama Bass	Micropterus henshalli	NA
Percidae
	Turquoise Darter	Etheostoma inscriptum	0	0	1	1	1	0.5	0	0	0	0	0	0
	Blackbanded Darter	Percina nigrofasciata	0	0	0	0	0.25	1	0	0	0	0	0	0
